# Supplementary material
Source: Royal Society of Chemistry journal article supplement (doi:10.1039/d5bm01812a)
Supplement: d5bm01812a1.pdf [file d5bm01812a1.pdf]

## Supporting information for:

# Engineering immunostimulatory nanocarriers: TLR7-agonist conjugated poly( $\beta$ -amino ester) mRNA delivery systems

Hulya Bayraktutan<sup>abc</sup>, Amr Elsherbeny<sup>ab</sup>, Rafał J. Kopiasz<sup>ad</sup>, Charlotte Galley<sup>e</sup>, Nurcan Gumus<sup>abfg</sup>, Clare L Bennett<sup>e</sup>, Cameron Alexander<sup>\*a</sup> and Pratik Gurnani<sup>\*h</sup>

<sup>a</sup> Division of Molecular Therapeutics and Formulation, Boots Science Building, School of Pharmacy, University of Nottingham, Nottingham, NG7 2RD, UK

<sup>b</sup> Biodiscovery Institute, School of Medicine, University of Nottingham, Nottingham, NG7 2UH, UK.

<sup>c</sup> Department of Pharmaceutical Biotechnology, Faculty of Pharmacy, Hacettepe University, Ankara 06100, Türkiye

<sup>d</sup> Warsaw University of Technology, Faculty of Chemistry, Noakowskiego 3 St., 00-664, Warsaw, Poland

<sup>e</sup> Department of Haematology, UCL Cancer Institute, 72 Huntley Street, University College London, London, WC1E 6DD, UK

<sup>f</sup> Department of Medical Biology, Faculty of Medicine, Izmir Bakircay University, Izmir, Türkiye

<sup>g</sup> Department of Medical Pharmacology, Faculty of Medicine, Izmir Bakircay University, Izmir, Türkiye

<sup>h</sup> UCL School of Pharmacy, University College London, 29-39 Brunswick Square, Bloomsbury, London, WC1N 1AX, UK

| Antibody                             | Supplier                 | Catalog number | RRID        | Dilution |
|--------------------------------------|--------------------------|----------------|-------------|----------|
| Anti-mouse B220 APC Cy7 (RA3-6B2)    | BioLegend                | 103224         | AB_313007   | 1:200    |
| Anti-mouse CD4 APC Cy7 (GK1.5)       | Thermo Fisher Scientific | 12-0041-82     | AB_465506   | 1:200    |
| Anti-mouse CD11c APC (HL3)           | BD Biosciences           | 550261         | AB_398460   | 1:100    |
| Anti-mouse CD45 BV605 (30-F11)       | BioLegend                | 103155         | AB_2650656  | 1:800    |
| Anti-mouse CD86 PE Cy7 (GL1)         | BioLegend                | 105014         | AB_439783   | 1:400    |
| Anti-mouse Ly6c APC Cy7 (HK1.4)      | BioLegend                | 128025         | AB_10643867 | 1:200    |
| Anti-mouse Ly6G APC Cy7 (1A8)        | BioLegend                | 127624         | AB_10640819 | 1:200    |
| Anti-mouse MHC II V510 (M5/114.15.2) | BioLegend                | 107636         | AB_2561397  | 1:800    |
| Anti-mouse NK1.1 APC Cy7 (PK136)     | BioLegend                | 108724         | AB_830871   | 1:200    |

**Table S1.** Details on antibodies used.

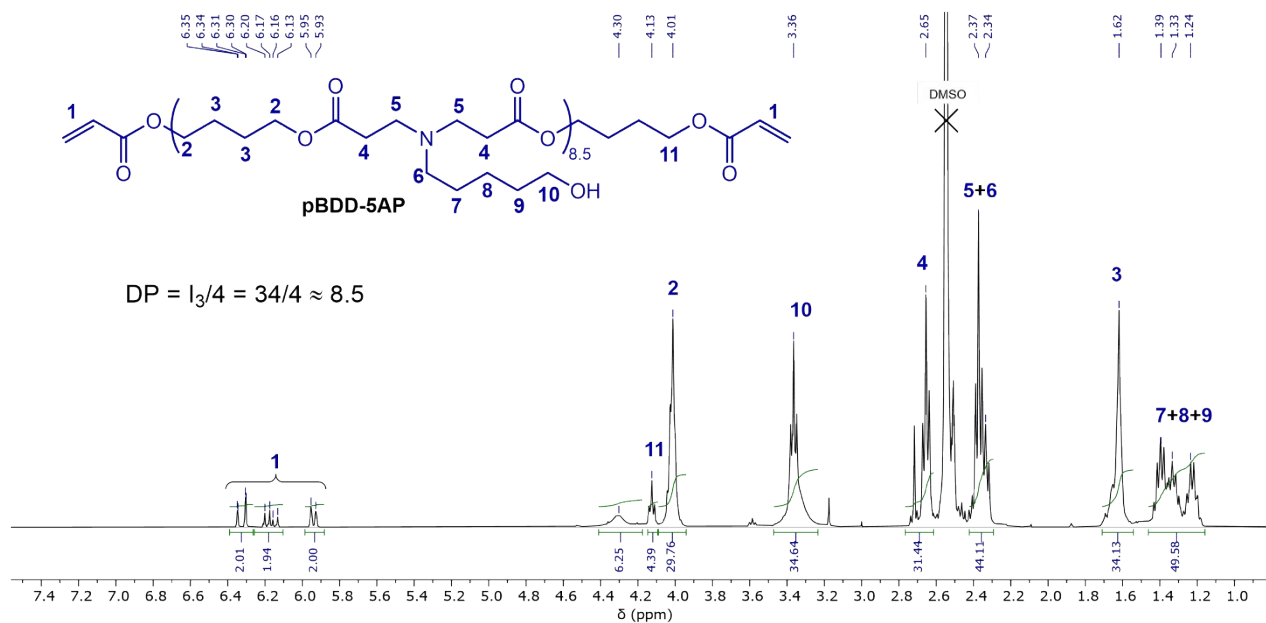

**Spectrum S1.** 1H NMR (400 MHz, DMSO-d<sub>6</sub>) of pBDD-5AP.

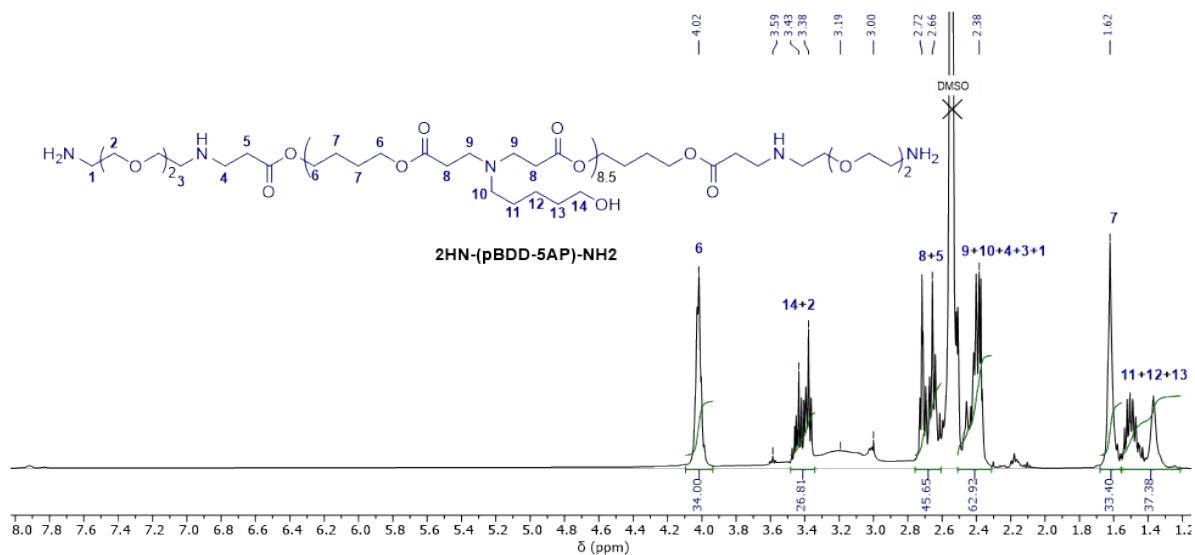

**Spectrum S2.** 1H NMR (400 MHz, DMSO-d<sub>6</sub>) of H<sub>2</sub>N-(pBDD-5AP)-NH<sub>2</sub>.

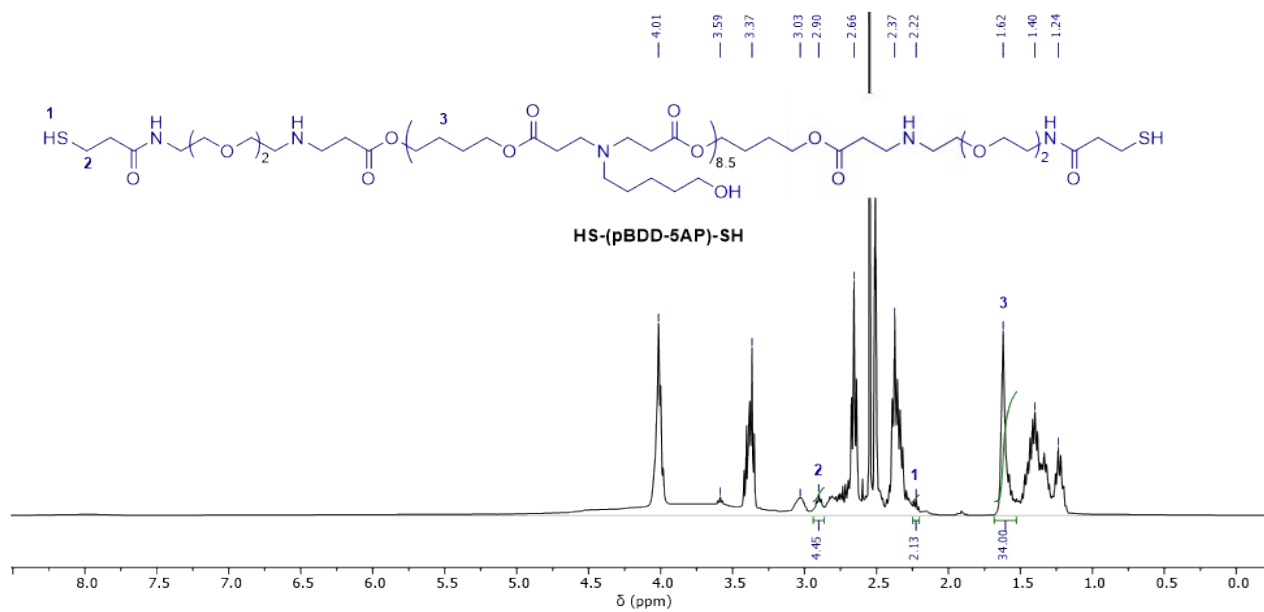

**Spectrum S3.**  $^1\text{H}$  NMR (400 MHz, DMSO- $d_6$ ) of HS-(pBDD-5AP)-SH.

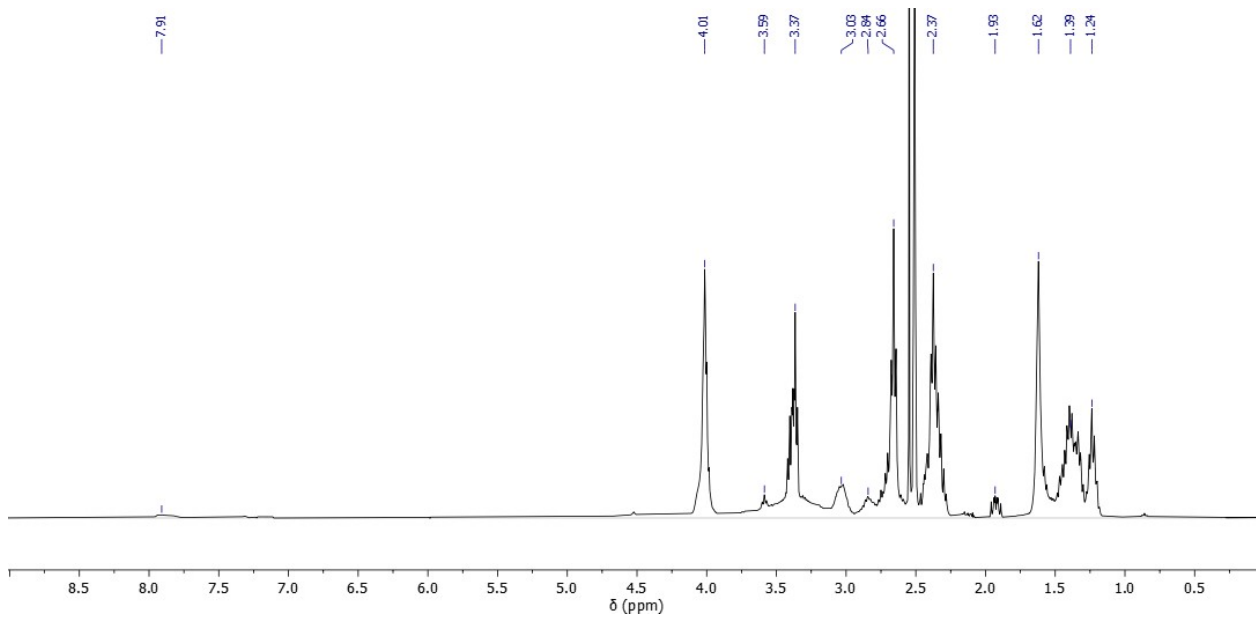

**Spectrum S4.**  $^1\text{H}$  NMR (400 MHz, DMSO- $d_6$ ) of LOX-(pBDD-5AP)-LOX.

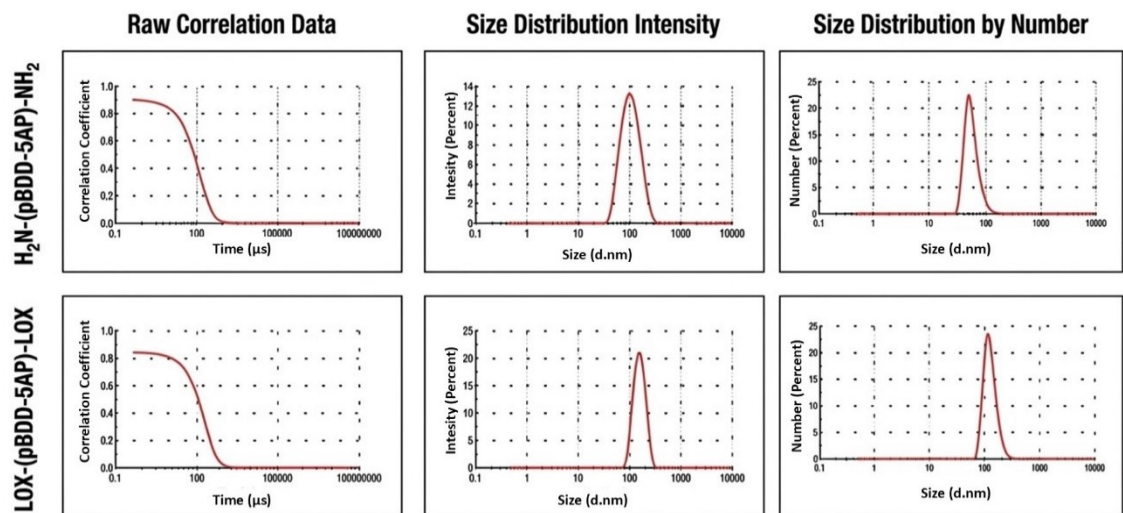

**Figure S1.** Representative Raw Correlation Data, Size Distribution Data and Size Distribution by Number Data measured by DLS for the nanoparticles  $H_2N-(pBDD-5AP)-NH_2$  and  $LOX-(pBDD-5AP)-LOX$ .

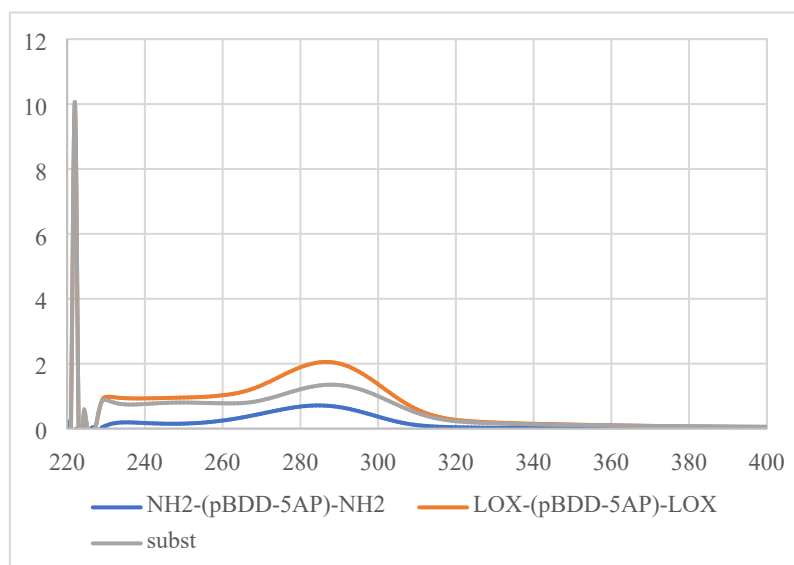

**Figure S2.** Determination of Drug Loading Using UV-vis spectroscopy.

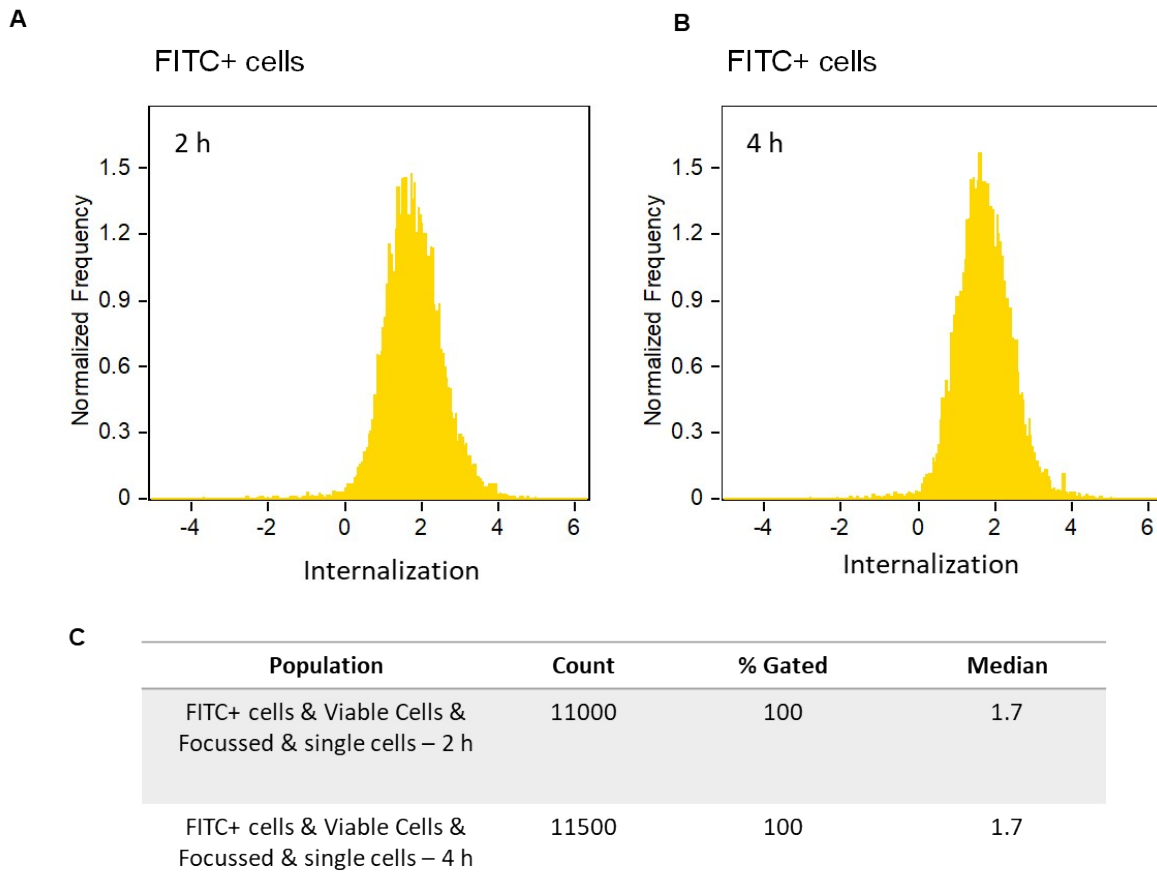

**Figure S3. Cellular uptake of PBAE derived saRNA polyplexes.** (A-B) Imaging flow cytometry internalisation histograms and (C) statistical values for DC2.4 cells after 2h and 4 h following treatment with FITC-labelled LOX-(pBDD-5AP)-LOX polyplexes at a PBAE/saRNA w/w ratio of 128 at a concentration of 500 ng/mL saRNA. Data were analysed using IDEAS software.

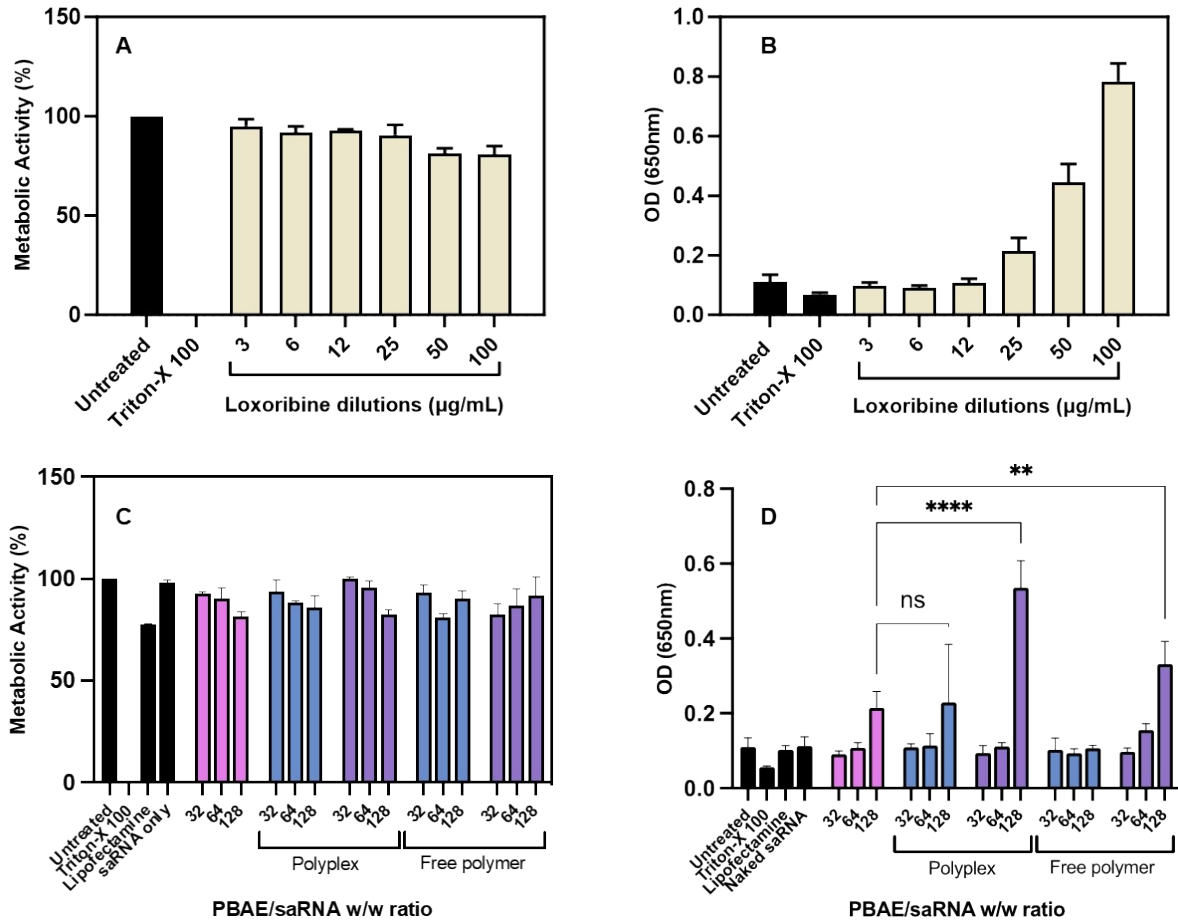

**Figure S4. TLR7 Activation Assay using HEK-BLUE cells.** (A) The determination of the TLR7 activation capacity of loxoribine dilutions (3 – 100 µg/mL) compared to controls in HEK-BLUE cells. (B) Metabolic activity of loxoribine dilutions (3 – 100 µg/mL) compared to controls in HEK-BLUE cells. (C) The determination of the TLR7 activation capacity of amine and loxoribine-end-capped polyplexes and free polymers (w/w 32, 64 and 128) compared to controls in HEK-BLUE cells. (D) Metabolic activity of the amine and loxoribine-end-capped polyplexes and free polymers (w/w 32, 64 and 128) compared to controls in HEK-BLUE cells.
